# Supplementary material for: Synthesis, structure, and characterization of a new thorium–organic framework material, Th3F5[(C10H14)(CH2CO2)2]3(NO3)
Source: Royal Society of Chemistry journal article supplement (doi:10.1039/b812629a), 2008-01-01

Electronic Supplementary Information (ESI) for:

**Synthesis, structure, and characterization of a new thorium-organic  
framework material,  $\text{Th}_3\text{F}_5[(\text{C}_{10}\text{H}_{14})(\text{CH}_2\text{CO}_2)_2]_3(\text{NO}_3)$**

Kang Min Ok<sup>a</sup> and Dermot O'Hare<sup>b,\*</sup>

<sup>a</sup>*Department of Chemistry, Chung-Ang University, Seoul, 155-756, Republic of Korea.*

<sup>b</sup>*Chemistry Research Laboratory, University of Oxford, Oxford, OX1 3TA, UK.*

\*Corresponding Author

Professor Dermot O'Hare

*Fax: 44 1865 285131; Tel: 44 1865 285130; E-mail: [dermot.ohare@chem.ox.ac.uk](mailto:dermot.ohare@chem.ox.ac.uk)*

- S1. Experimental and calculated powder X-ray diffraction patterns for  $\text{Th}_3\text{F}_5[(\text{C}_{10}\text{H}_{14})(\text{CH}_2\text{CO}_2)_2]_3(\text{NO}_3)$
- S2. Thermogravimetric analysis diagram for  $\text{Th}_3\text{F}_5[(\text{C}_{10}\text{H}_{14})(\text{CH}_2\text{CO}_2)_2]_3(\text{NO}_3)$
- S3. IR spectrum for  $\text{Th}_3\text{F}_5[(\text{C}_{10}\text{H}_{14})(\text{CH}_2\text{CO}_2)_2]_3(\text{NO}_3)$

S1. Experimental and calculated powder X-ray diffraction patterns for  $\text{Th}_3\text{F}_5[(\text{C}_{10}\text{H}_{14})(\text{CH}_2\text{CO}_2)_2]_3(\text{NO}_3)$

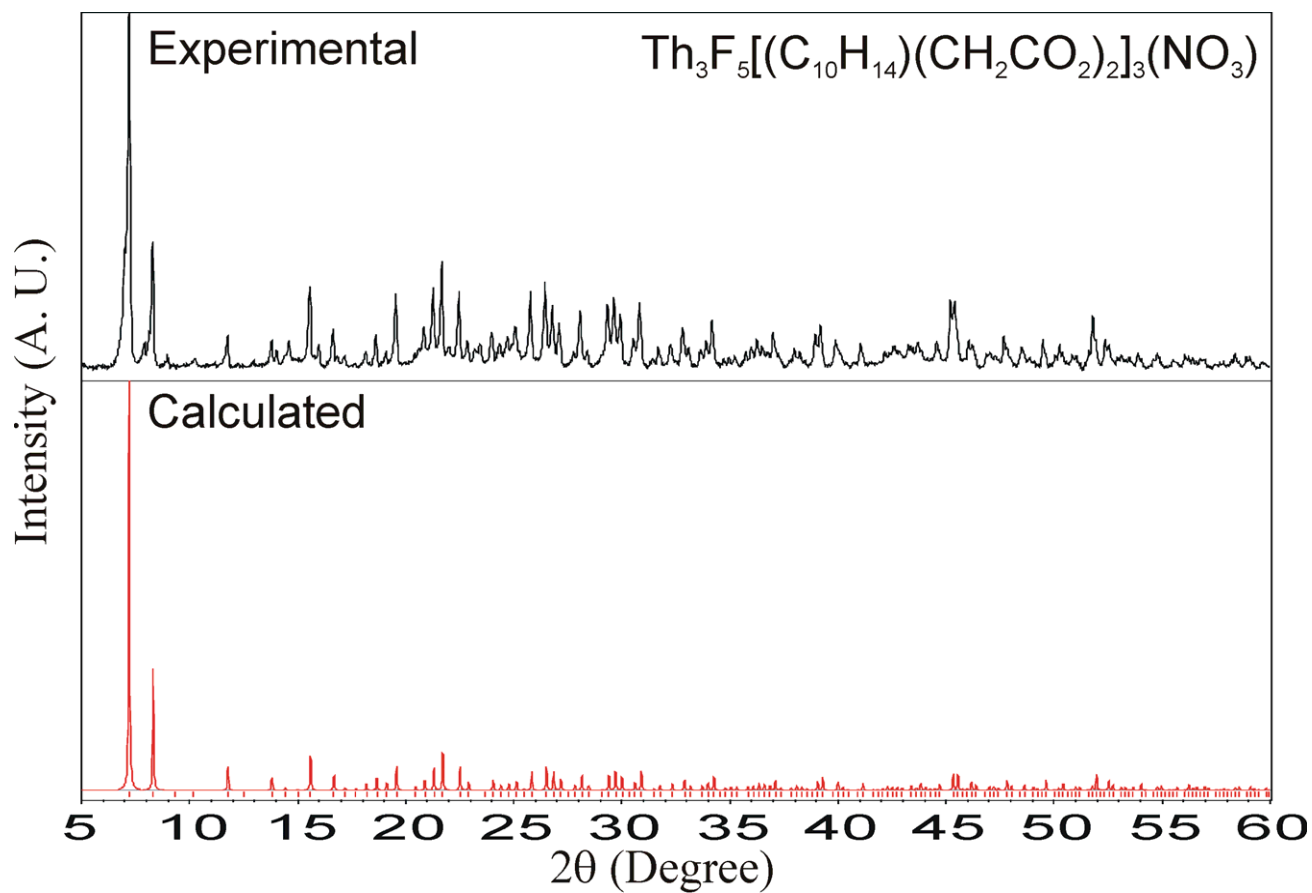

S2. Thermogravimetric analysis diagram for  $\text{Th}_3\text{F}_5[(\text{C}_{10}\text{H}_{14})(\text{CH}_2\text{CO}_2)_2]_3(\text{NO}_3)$

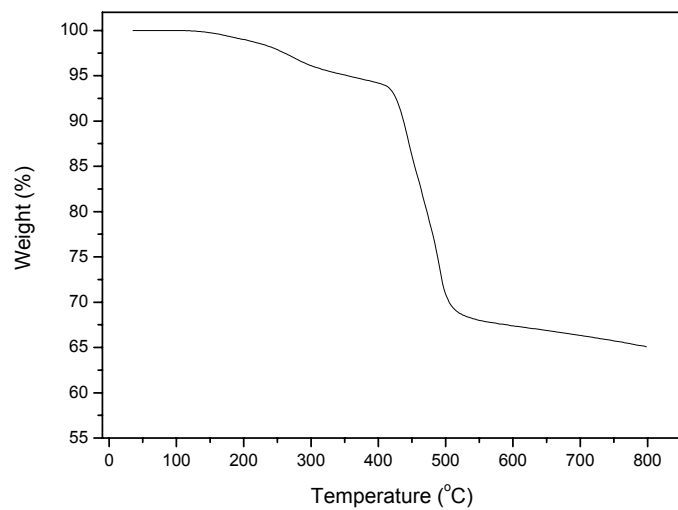

S3. IR spectrum of  $\text{Th}_3\text{F}_5[(\text{C}_{10}\text{H}_{14})(\text{CH}_2\text{CO}_2)_2]_3(\text{NO}_3)$

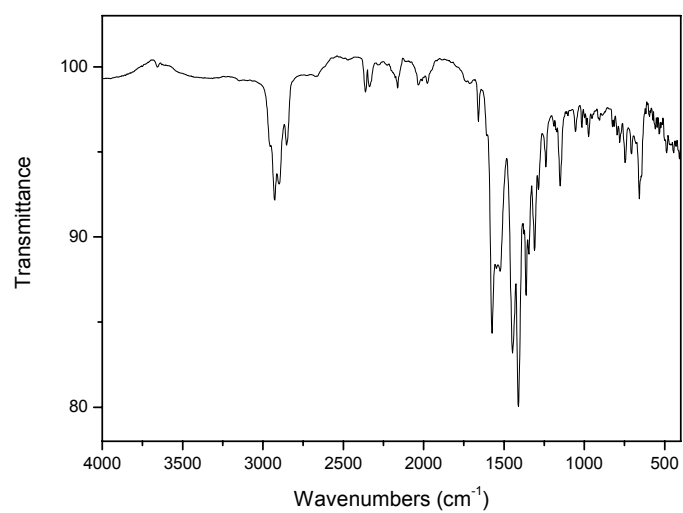

Supplement: b812629a.pdf [file b812629a.pdf]
